# Supplementary material for: Genome-Wide SNP Markers Based on SLAF-Seq Uncover Genetic Diversity of Saccharina Cultivars in Shandong, China
Source: Frontiers journal article supplement (doi:10.3389/fmars.2022.849502), 2022-04-22
Supplement: Table_4.xlsx [file Table_4.xlsx]

## Sheet: Sheet1
Clustering of different accessions
Sample ID	Q1	Q2
DBC-1	0.749425	0.250575
DBC-2	0.893592	0.106408
DBC-3	0.786885	0.213115
DBC-4	0.912309	0.087691
DBC-5	0.906976	0.093024
DBC-6	0.886748	0.113252
DBC-7	0.841013	0.158987
DBC-8	0.99999	1e-05
DBC-9	0.954953	0.045047
407-1	0.698853	0.301147
407-2	0.744554	0.255446
407-3	0.721812	0.278188
407-4	0.736092	0.263908
407-5	0.719868	0.280132
407-6	0.671346	0.328654
407-7	0.720172	0.279828
407-8	0.654146	0.345854
407-9	0.668858	0.331142
YZ-1	0.823946	0.176054
YZ-2	0.743255	0.256745
YZ-3	0.684213	0.315787
YZ-4	0.70414	0.29586
YZ-5	0.621935	0.378065
YZ-6	0.748025	0.251975
YZ-7	0.715256	0.284744
YZ-8	0.613805	0.386195
YZ-9	0.749692	0.250308
BN-1	0.99999	1e-05
BN-2	0.966006	0.033994
BN-3	0.99999	1e-05
BN-4	0.99999	1e-05
BN-5	0.99999	1e-05
BN-6	0.932653	0.067347
BN-7	0.99999	1e-05
BN-8	0.981422	0.018578
BN-9	0.988284	0.011716
XBN-1	0.695741	0.304259
XBN-2	0.684725	0.315275
XBN-3	0.714958	0.285042
XBN-4	0.909276	0.090724
XBN-5	0.703159	0.296841
XBN-6	0.778352	0.221648
XBN-7	0.780079	0.219921
XBN-8	0.720468	0.279532
XBN-9	0.619407	0.380593
HK-1	0.926767	0.073233
HK-2	0.910787	0.089213
HK-3	0.839914	0.160086
HK-4	0.803363	0.196637
HK-5	0.813548	0.186452
HK-6	0.806103	0.193897
HK-7	0.9384	0.0616
HK-8	0.763306	0.236694
HK-9	0.797941	0.202059
DF1-1	0.79032	0.20968
DF1-2	0.800931	0.199069
DF1-3	0.798879	0.201121
DF1-4	0.816814	0.183186
DF1-5	0.803335	0.196665
DF1-6	0.727143	0.272857
DF1-7	0.747679	0.252321
DF1-8	0.776608	0.223392
DF1-9	0.772841	0.227159
DF2-1	1e-05	0.99999
DF2-2	1e-05	0.99999
DF2-3	1e-05	0.99999
DF2-4	1e-05	0.99999
DF2-5	1e-05	0.99999
DF2-6	1e-05	0.99999
DF2-7	1e-05	0.99999
DF2-8	1e-05	0.99999
DF2-9	1e-05	0.99999
DF3-1	0.99999	1e-05
DF3-2	0.99999	1e-05
DF3-3	0.959281	0.040719
DF3-4	0.99999	1e-05
DF3-5	0.958271	0.041729
DF3-6	0.957111	0.042889
DF3-7	0.99999	1e-05
DF3-8	0.99999	1e-05
DF3-9	0.910269	0.089731
DF4-1	0.99999	1e-05
DF4-2	0.99999	1e-05
DF4-3	0.99999	1e-05
DF4-4	0.99999	1e-05
DF4-5	0.99999	1e-05
DF4-6	0.938824	0.061176
DF4-7	0.99999	1e-05
DF4-8	0.99999	1e-05
DF4-9	0.776083	0.223917
DF5-1	0.750761	0.249239
DF5-2	0.648969	0.351031
DF5-3	0.764649	0.235351
DF5-4	0.823066	0.176934
DF5-5	0.686436	0.313564
DF5-6	0.707426	0.292574
DF5-7	0.705431	0.294569
DF5-8	0.667404	0.332596
DF5-9	0.58672	0.41328
DF6-1	1e-05	0.99999
DF6-2	1e-05	0.99999
DF6-3	1e-05	0.99999
DF6-4	1e-05	0.99999
DF6-5	1e-05	0.99999
DF6-6	1e-05	0.99999
DF6-7	1e-05	0.99999
DF6-8	1e-05	0.99999
DF6-9	1e-05	0.99999
DF8-1	1e-05	0.99999
DF8-2	1e-05	0.99999
DF8-3	1e-05	0.99999
DF8-4	1e-05	0.99999
DF8-5	1e-05	0.99999
DF8-6	1e-05	0.99999
DF8-7	1e-05	0.99999
DF8-8	1e-05	0.99999
DF8-9	1e-05	0.99999
